# Supplementary material for: Cytotoxic stress induces transfer of mitochondria-associated human endogenous retroviral RNA and proteins between cancer cells
Source: PubMed Central journal article supplement (PMC5707072; doi:10.18632/oncotarget.21606), 2017-10-07
Supplement: oncotarget-08-95945-s001.pdf [file oncotarget-08-95945-s001.pdf]

## **Cytotoxic stress induces transfer of mitochondria-associated human endogenous retroviral rna and proteins between cancer cells**

### **SUPPLEMENTARY MATERIALS**

**Supplementary Biochemie 1:**

**See Supplementary File 1**
